# Supplementary material
Source: ML conference proceedings conference paper supplement (https://proceedings.mlr.press/v48/kanagawa16.html)
Supplement: Supplementary file 1 [file kanagawa16-supp.pdf]

---

# Supplementary material: Gaussian process nonparametric tensor estimator and its minimax optimality

---

Heishiro Kanagawa<sup>†</sup>

KANAGAWA.H.AB@M.TITECH.AC.JP

Taiji Suzuki<sup>†,‡</sup>

SUZUKI.T.CT@M.TITECH.AC.JP

<sup>†</sup> Tokyo Institute of Technology, Tokyo 152-8552, JAPAN

<sup>‡</sup> PRESTO, Japan Science and Technological Agency (JST), JAPAN

Hayato Kobayashi\*

HAKOBAYA@YAHOO-CORP.JP

Nobuyuki Shimizu\*

NOBUSHIM@YAHOO-CORP.JP

Yukihiro Tagami\*

YUTAGAMI@YAHOO-CORP.JP

\* Yahoo Japan Corporation, Tokyo 107-6211, JAPAN

In this supplementary material, we give the comprehensive proof and the generalized theorems. We consider a more general regression setting:

$$y_i = f^\circ(x_i) + \epsilon_i, \quad (\text{S-1})$$

where  $f^\circ : \mathcal{X} \rightarrow \mathbb{R}$  is the unknown true function. We suppose that the true function  $f^\circ$  is well approximated by  $f^* = \sum_{r=1}^{d^*} \prod_{k=1}^K f_r^{*(k)}$  (that is  $f^\circ \simeq f^*$ ). When  $f^\circ = f^*$ , this generalized regression problem is equivalent to that in the main body. In that sense, the model (S-1) contains the model in the main body as a special setting  $f^\circ = f^*$ .

## A. Noise Assumption and PAC-Bayesian Bound

Here we remind our assumption on the noise  $\epsilon_i$  (Assumption 1). There are a lot of choices of noise conditions to establish PAC-Bayesian bounds. Here we employ a condition with which we can utilize an extension of Stein's identity. Now define a function

$$m_\epsilon(z) := -\mathbb{E}[\epsilon_1 \mathbf{1}\{\epsilon_1 \leq z\}] = -\int_{-\infty}^z y dF_\epsilon(y) = \int_z^\infty y dF_\epsilon(y),$$

where  $F_\epsilon(z) = P(\epsilon_1 \leq z)$  is the cumulative distribution function of the noise, and  $\mathbf{1}\{\cdot\}$  is the indicator function. Since  $\mathbb{E}[\epsilon_1] = 0$ , one can check that  $m_\epsilon(z)$  is non-negative and achieves its maximum at 0:  $\max_{z \in \mathbb{R}} m_\epsilon(z) = m_\epsilon(0) = \mathbb{E}[|\epsilon_1|]/2$ . Then we impose the following assumption on the noise  $\xi$ .

**Assumption A.1.**  $\mathbb{E}[\epsilon_1^2] < \infty$  and the measure  $m_\epsilon(z)dz$  is absolutely continuous with respect to the density function  $dF_\epsilon(z)$  with a bounded Radon-Nikodym derivative, i.e., there exists a bounded function  $g_\epsilon : \mathbb{R} \rightarrow \mathbb{R}_+$  such that

$$\int_a^b m_\epsilon(z)dz = \int_a^b g_\epsilon(z)dF_\epsilon(z), \quad \forall a, b \in \mathbb{R}.$$

This characterization of noise gives an extension of the Gaussian noise. Indeed the following examples satisfy the assumption:

- If  $\epsilon_1$  obeys the Gaussian  $\mathcal{N}(0, \sigma^2)$ , then  $g_\epsilon(z) = \sigma^2$ ,
- If  $\epsilon_1$  obeys the uniform distribution on  $[-a, a]$ , then  $g_\epsilon(z) = \max(a^2 - z^2, 0)/2$ .

Under Assumption 1, Theorem 1 of (Dalalyan & Tsybakov, 2008) gives the following PAC-Bayesian bound. For a probability measure  $\rho$  that is absolutely continuous with respect to  $\Pi$ , let  $\mathcal{K}(\rho, \Pi)$  be the KL-divergence between  $\rho$  and  $\Pi$ ,  $\mathcal{K}(\rho, \Pi) := \int \log\left(\frac{d\rho}{d\Pi}(f)\right) d\rho(f)$ .

**Theorem A.1.** *Suppose Assumption 1 is satisfied and  $\beta \geq 4\|g_\epsilon\|_\infty$ . Then for all probability measure  $\rho$  that is absolutely continuous with respect to  $\Pi$ , we have*

$$\mathbb{E}_{Y_{1:n}|x_{1:n}} \left[ \|\hat{f} - f^\circ\|_n^2 \right] \leq \int \|f - f^\circ\|_n^2 d\rho(f) + \frac{\beta \mathcal{K}(\rho, \Pi)}{n}. \quad (\text{S-2})$$

In the following, we assume that  $\beta$  is chosen so that  $\beta \geq 4\|g_\epsilon\|_\infty$  is satisfied.

## B. Upper bound analysis

Let  $\mathcal{H}_{(r,k),\lambda}$  be the ‘‘scaled’’ version of an RKHS  $\mathcal{H}_{(r,k)}$ . That is  $\mathcal{H}_{(r,k),\lambda}$  is the RKHS associated with the kernel  $\tilde{k}_{m,\lambda_r^{(k)}} = k_{r,k}/\lambda_r^{(k)}$ .

The quantitative evaluation of the mass around the true function is given by the following *concentration function* (van der Vaart & van Zanten, 2011; 2008a):

$$\begin{aligned} \phi_{f_r^{*(k)}}^{(r,k)}(\epsilon, L, \lambda) := & \inf_{h \in \mathcal{H}_{(r,k)} : \|h - f_r^{*(k)}\|_\infty \leq \epsilon} \left( \|h\|_{\mathcal{H}_{(r,k),\lambda}}^2 \vee 1 \right) - \log \text{GP}_{(r,k)}(\{f : \|f\|_n \leq \epsilon/\sqrt{2}\}|\lambda), \\ & - \log \text{GP}_{(r,k)}(\{f : \|f\|_\infty \leq L/\sqrt{2}\}|\lambda), \end{aligned} \quad (\text{S-3})$$

where  $a \vee b := \max(a, b)$ . It can be shown that  $\phi_{f_r^{*(k)}}^{(r,k)}(\epsilon, \lambda)$  equals  $-\log \text{GP}_{(r,k)}(\{f : \|f_r^{*(k)} - f\|_\infty \leq \epsilon\}|\lambda)$  up to constants (van der Vaart & van Zanten, 2008b).

### B.1. Generalized upper bound

Define

$$\check{S} := \{r \mid 1 \leq r \leq d_{\max}, \exists k \text{ s.t. } f_r^{*(k)} \notin \mathcal{H}_{(r,k)}\}.$$

**Theorem B.1** (Convergence rate of GP-Tensor). *Let*

$$\hat{R}_{K,\max} := \left( R + 2 \max_{r,k} L_{(r,k)} \right)^{2(K-1)},$$

and set  $c_r = 1$  if  $r \notin \check{S}$ , and  $c_r = K$  otherwise. Then, there exists a constant  $C_1$  depending on only  $\beta$  such that the convergence rate of Bayesian-MKL is bounded as

$$\begin{aligned} \mathbb{E}_{Y_{1:n}|x_{1:n}} \left[ \|\hat{f} - f^\circ\|_n^2 \right] & \leq 2\|f^\circ - f^*\|_n^2 \\ & + C_1 \inf_{\epsilon_{(r,k)}, L_{(r,k)}, \lambda_{(r,k)} > 0; \epsilon_{(r,k)} \leq L_{(r,k)}} \left\{ \sum_{r=1, \dots, d^*} c_r \sum_{k=1}^K \left( \hat{R}_{K,\max} \epsilon_{(r,k)}^2 + \frac{1}{n} \phi_{f_r^{*(k)}}^{(r,k)}(\epsilon_{(r,k)}, L_{(r,k)}, \lambda_{(r,k)}) + \frac{\lambda_{(r,k)}}{n} - \frac{\log(\lambda_{(r,k)})}{n} \right) \right. \\ & \left. + \hat{R}_{K,\max} \left( \sum_{r \in \check{S}} \sqrt{\sum_{k=1}^K \epsilon_{(r,k)}^2} \right)^2 \right\} + \frac{d^*}{n} \log \left( \frac{1}{\zeta(1-\zeta)} \right). \end{aligned} \quad (\text{S-4})$$

### B.2. Proof of Theorem B.1

We go along the same line with (Suzuki, 2012). Fix  $\epsilon_{(r,k)}, \lambda_{(r,k)}, L_{(r,k)} > 0$  for  $r = 1, \dots, d_{\max}$  and  $k = 1, \dots, K$ . The typical approach to prove the theorem is that we substitute some ‘‘dummy’’ posterior distribution into  $\rho$  in Eq. (S-2) of Theorem A.1 (the PAC-Bayes bound). For  $\epsilon_{(r,k)} > 0$  and  $L_{(r,k)} > 0$ , define a set  $\mathcal{S}_{(r,k)}$  of a function as

$$\mathcal{S}_{(r,k)} := \{f : \mathcal{X} \rightarrow \mathbb{R} \mid \|f\|_n \leq \epsilon_{(r,k)}, \|f\|_\infty \leq L_{(r,k)}\}.$$

We define  $\tilde{h}_{(r,k)} \in \mathcal{H}_{(r,k)}$  for each  $r, k$  so that it is an approximation of  $f_r^{*(k)}$  as follows. If  $f_r^{*(k)} \in \mathcal{H}_{(r,k)}$ , then we take  $\tilde{h}_{(r,k)}$  as  $\tilde{h}_{(r,k)} = f_r^{*(k)}$ . Otherwise, we take  $\tilde{h}_{(r,k)} \in \mathcal{H}_{(r,k)}$  such that

$$\|\tilde{h}_{(r,k)}\|_{\mathcal{H}_{(r,k),\lambda_{(r,k)}}}^2 \leq 2 \inf_{h \in \mathcal{H}_{(r,k)}: \|h - f_r^{*(k)}\|_\infty \leq \epsilon_{(r,k)}} \|h\|_{\mathcal{H}_{(r,k),\lambda_{(r,k)}}}^2, \quad (\text{S-5})$$

$$\tilde{h}_{(r,k)} - f_r^{*(k)} \in \mathcal{S}_{(r,k)}. \quad (\text{S-6})$$

The process  $(W_x + \tilde{h}_{(r,k)}(x) : x \in \mathcal{X}_k)$  induces the ‘‘shifted’’ Gaussian process  $\text{GP}_{(r,k)}^{W+\tilde{h}_{(r,k)}}(\text{d}f_r^{(k)}|\lambda)$  such that  $\text{GP}_{(r,k)}^{W+\tilde{h}_{(r,k)}}(A|\lambda) := \text{GP}_{(r,k)}(A - \tilde{h}_{(r,k)}|\lambda)$  for a measurable set  $A$ . Now our choice of  $\rho$  is given as follows:

$$\begin{aligned} \rho(\text{d}f) &= \prod_{r=1,\dots,d^*} \prod_{k=1}^K \frac{\int_{\frac{\lambda_{(r,k)}}{2} \leq \tilde{\lambda}_{(r,k)} \leq \lambda_{(r,k)}} \text{GP}_{(r,k)}^{W+\tilde{h}_{(r,k)}}(\text{d}f_r^{(k)}|\tilde{\lambda}_{(r,k)}) \mathbf{1}\{f_r^{(k)} - \tilde{h}_{(r,k)} \in \mathcal{S}_{(r,k)}\}}{\text{GP}_{(r,k)}(\mathcal{S}_{(r,k)}|\tilde{\lambda}_{(r,k)})} \mathcal{G}(\text{d}\tilde{\lambda}_{(r,k)}) \\ &\quad \times \prod_{r>d^*} \prod_{k=1}^K \delta_0(\text{d}f_r^{(k)}). \end{aligned}$$

According to the proof of Theorem 3 in Suzuki (2012), it is shown that  $\rho$  is absolutely continuous with respect to the prior  $\Pi$ . Therefore, we may apply Theorem A.1.

Let  $R := \max_{r,k} \{\|f_r^{*(k)}\|_\infty\}$ . Then, since  $\tilde{h}_{(r,k)}$  satisfies  $\|\tilde{h}_{(r,k)} - f_r^{*(k)}\|_\infty \leq L_{(r,k)}$  by the definition (Eq. (S-6)), it holds that

$$\|\tilde{h}_{(r,k)}\|_\infty \leq \epsilon_{(r,k)} + R.$$

Similarly, for all  $f_r^{(k)}$  in the support of  $\rho$ , we have that  $\|f_r^{(k)} - \tilde{h}_{(r,k)}\|_\infty \leq L_{(r,k)}$  and by assuming  $\epsilon_{(r,k)} \leq L_{(r,k)}$ ,

$$\|f_r^{(k)}\|_\infty \leq \epsilon_{(r,k)} + L_{(r,k)} + R \leq 2L_{(r,k)} + R. \quad (\text{S-7})$$

Note that for  $f = \sum_{r=1}^{d_{\max}} \prod_{k=1}^K f_r^{(k)}$  and  $f^* = \sum_{r=1}^{d_{\max}} \prod_{k=1}^K f_r^{*(k)}$ , it holds that

$$\int \|f - f^*\|_n^2 \text{d}\rho(f) \leq 2 \int \|f - f^*\|_n^2 \text{d}\rho(f) + 2 \int \|f^* - f^0\|_n^2 \text{d}\rho(f).$$

Thus we just need to bound the first term of the RHS:

$$\begin{aligned} &\int \|f - f^*\|_n^2 \text{d}\rho(f) \\ &= \int \left\| \sum_{r=1}^{d_{\max}} \left( \prod_{k=1}^K f_r^{(k)} - \prod_{k=1}^K f_r^{*(k)} \right) \right\|_n^2 \text{d}\rho(f) \\ &= \int \left\| \sum_{r=1}^{d^*} \left( \prod_{k=1}^K f_r^{(k)} - \prod_{k=1}^K f_r^{*(k)} \right) \right\|_n^2 \text{d}\rho(f) \\ &= \sum_{r=1}^{d^*} \int \left\| \prod_{k=1}^K f_r^{(k)} - \prod_{k=1}^K f_r^{*(k)} \right\|_n^2 \text{d}\rho(f) \\ &\quad - 2 \sum_{r \neq r': 1 \leq r, r' \leq d^*} \int \left\langle \prod_{k=1}^K f_r^{(k)} - \prod_{k=1}^K f_r^{*(k)}, \prod_{k=1}^K f_{r'}^{(k)} - \prod_{k=1}^K f_{r'}^{*(k)} \right\rangle_n \text{d}\rho(f). \end{aligned}$$

The first term of the RHS is evaluated by

$$\sum_{r=1}^{d^*} \int \left\| \prod_{k=1}^K f_r^{(k)} - \prod_{k=1}^K f_r^{*(k)} \right\|_n^2 \text{d}\rho(f)$$

$$\begin{aligned}
 &= \sum_{r=1}^{d^*} \int \left\| \sum_{\tilde{k}=1}^K \left( \prod_{k'=1}^{k-1} f_r^{(k')} \right) (f_r^{(k)} - f_r^{*(k)}) \left( \prod_{k'=k+1}^K f_r^{*(k')} \right) \right\|_n^2 d\rho(f) \\
 &= \sum_{r=1}^{d^*} \sum_{k=1}^K \sum_{\tilde{k}=1}^K \int \left\langle \left( \prod_{k'=1}^{k-1} f_r^{(k')} \right) (f_r^{(k)} - f_r^{*(k)}) \left( \prod_{k'=k+1}^K f_r^{*(k')} \right), \right. \\
 &\quad \left. \left( \prod_{k'=1}^{\tilde{k}-1} f_r^{(k')} \right) (f_r^{(\tilde{k})} - f_r^{*(\tilde{k})}) \left( \prod_{k'=\tilde{k}+1}^K f_r^{*(k')} \right) \right\rangle_n d\rho(f) \\
 &= \sum_{r=1}^{d^*} \sum_{k=1}^K \sum_{\tilde{k}=1}^K \int \left\langle \left( \prod_{k'=1}^{k-1} f_r^{(k')} \right) (f_r^{(k)} - f_r^{*(k)}) \left( \prod_{k'=k+1}^K f_r^{*(k')} \right), \right. \\
 &\quad \left. \left( \prod_{k'=1}^{\tilde{k}-1} f_r^{(k')} \right) (f_r^{(\tilde{k})} - f_r^{*(\tilde{k})}) \left( \prod_{k'=\tilde{k}+1}^K f_r^{*(k')} \right) \right\rangle_n d\rho(f).
 \end{aligned}$$

If  $k \neq \tilde{k}$  and  $r \notin \check{S}$ , then the summand of the RHS is 0, otherwise the summand is bounded by  $\frac{1}{2} \sum_{k''=k, \tilde{k}} \int \left\| \left( \prod_{k'=1}^{k''-1} f_r^{(k')} \right) (f_r^{(k'')} - f_r^{*(k'')}) \left( \prod_{k'=k''+1}^K f_r^{*(k')} \right) \right\|_n^2 d\rho(f)$ . Hence, by setting  $c_r = 1$  if  $r \notin \check{S}$ , and  $c_r = K$  otherwise, then Lemma B.1 and Eq. (S-7) give an upper bound of the RHS as

$$\begin{aligned}
 &\sum_{r=1}^{d^*} c_r \sum_{k=1}^K \int \left\| \left( \prod_{k'=1}^{k-1} f_r^{(k')} \right) (f_r^{(k)} - f_r^{*(k)}) \left( \prod_{k'=k+1}^K f_r^{*(k')} \right) \right\|_n^2 d\rho(f) \\
 &\leq \sum_{r=1}^{d^*} c_r \sum_{k=1}^K \prod_{k' \neq k} (R + 2L_{(r, k')})^2 \int \|f_r^{(k)} - f_r^{*(k)}\|_n^2 d\rho(f) \\
 &\leq (R + 2 \max_{r, k} L_{(r, k)})^{2(K-1)} \sum_{r=1}^{d^*} c_r \sum_{k=1}^K 2 \int (\|f_r^{(k)} - \tilde{h}_{(r, k)}\|_n^2 + \|\tilde{h}_{(r, k)} - f_r^{*(k)}\|_n^2) d\rho(f) \\
 &\leq 4 \left( R + 2 \max_{r, k} L_{(r, k)} \right)^{2(K-1)} \sum_{r=1}^{d^*} c_r \sum_{k=1}^K \epsilon_{(r, k)}^2. \tag{S-8}
 \end{aligned}$$

On the other hand, using Lemma B.1 again, an analogous reasoning gives a bound of the second term as

$$\begin{aligned}
 &\left| \int \left\langle \prod_{k=1}^K f_r^{(k)} - \prod_{k=1}^K f_r^{*(k)}, \prod_{k=1}^K f_{r'}^{(k)} - \prod_{k=1}^K f_{r'}^{*(k)} \right\rangle_n d\rho(f) \right| \\
 &= \left| \left\langle \prod_{k=1}^K \tilde{h}_{(r, k)} - \prod_{k=1}^K f_r^{*(k)}, \prod_{k=1}^K \tilde{h}_{(r', k)} - \prod_{k=1}^K f_{r'}^{*(k)} \right\rangle_n \right| \\
 &\leq \begin{cases} 0, & (r \notin \check{S} \text{ or } r' \notin \check{S}), \\ \left( R + 2 \max_{\tilde{r}, \tilde{k}} L_{(\tilde{r}, \tilde{k})} \right)^{2(K-1)} \sqrt{\sum_{k=1}^K \epsilon_{(r, k)}^2} \sqrt{\sum_{k=1}^K \epsilon_{(r', k)}^2}, & (\text{otherwise}). \end{cases} \tag{S-9}
 \end{aligned}$$

Now define

$$\widehat{\phi}_{f_r^{(k)}}^{(r, k)}(\epsilon_{(r, k)}, L_{(r, k)}, \lambda) := \inf_{h \in \mathcal{H}_{(r, k)} : \|h - f_r^{*(k)}\|_\infty \leq \epsilon} \left( \|h\|_{\mathcal{H}_{(r, k), \lambda}}^2 \vee 1 \right) - \log \text{GP}_{(r, k)}(\mathcal{S}_{(r, k)} | \lambda).$$

Then, along with the proof of Theorem 3 in Suzuki (2012), the KL-divergence between the ‘‘posterior’’  $\rho$  and the prior  $\Pi$  is bounded as

$$\frac{1}{n} \mathcal{K}(\rho, \Pi)$$

$$\leq C'_1 \sum_{r=1}^{d^*} \sum_{k=1}^K \left( \frac{1}{n} \widehat{\phi}_{f_r^{*(k)}}^{(r,k)}(\epsilon_{(r,k)}, L_{(r,k)}, \lambda_{(r,k)}) + \frac{1}{n} \lambda_{(r,k)} - \frac{1}{n} \log \left( \frac{\lambda_{(r,k)}}{2} \right) \right) + \frac{d^*}{n} \log \left( \frac{1}{\zeta(1-\zeta)} \right), \quad (\text{S-10})$$

where  $C'_1$  is a universal constant. Here, since both of the sets  $\{f : \|f\|_n \leq \epsilon\}$  and  $\{f : \|f\|_\infty \leq L\}$  are convex and symmetric, we obtain by Proposition B.2 that

$$-\log \text{GP}_{(r,k)}(\mathcal{S}_{(r,k)}|\lambda) \leq -\log \text{GP}_{(r,k)}(\{f : \|f\|_n \leq \epsilon_{(r,k)}/\sqrt{2}\}|\lambda) - \log \text{GP}_{(r,k)}(\{f : \|f\|_\infty \leq L_{(r,k)}/\sqrt{2}\}|\lambda).$$

Thus

$$\widehat{\phi}_{f_r^{*(k)}}^{(r,k)}(\epsilon_{(r,k)}, L_{(r,k)}, \lambda_{(r,k)}) \leq \phi_{f_r^{*(k)}}^{(r,k)}(\epsilon_{(r,k)}, L_{(r,k)}, \lambda_{(r,k)}). \quad (\text{S-11})$$

Finally, combining Eq. (S-9), Eq. (S-8), and Eq. (S-10) with Eq. (S-11), we obtain the assertion.

**Lemma B.1.** For  $f(x) = \prod_{k=1}^K f_k(x) : \mathcal{X} \mapsto \mathbb{R}$  such that  $\|f_k\|_\infty \leq R$  ( $\forall k$ ), it holds that

$$\|f\|_n^2 \leq R^{K-1} \|f_k\|_n^2,$$

for all  $k = 1, \dots, K$ . In addition, for  $f'(x) = \prod_{k=1}^K f'_k(x) : \mathcal{X} \mapsto \mathbb{R}$  such that  $\|f'_k\|_\infty \leq R$  ( $\forall k$ ), it holds that

$$\langle f, f' \rangle_n \leq R^{K-1} \|f_k\|_n \|f'_k\|_n,$$

for all  $k = 1, \dots, K$ .

*Proof.*

$$\begin{aligned} \|f\|_n^2 &= \frac{1}{n} \sum_{i=1}^n \prod_{k=1}^K f_k(x_i)^2 \\ &\leq \frac{1}{n} \sum_{i=1}^n f_k(x_i)^2 \prod_{k' \neq k} \max_{i=1, \dots, n} \{f_{k'}(x_i)^2\} \leq R^{K-1} \frac{1}{n} \sum_{i=1}^n f_k(x_i)^2. \end{aligned}$$

Using the same reasoning, we obtain the second assertion by noticing  $\frac{1}{n} \sum_{i=1}^n |f_k(x_i) f'_k(x_i)| \leq \|f_k\| \|f'_k\|$ . □

Schechtman et al. (1998); Li (1999) showed the following theorem.

**Proposition B.2.** Let  $\rho$  be a centered Gaussian measure on a separable Banach space  $E$ . Then for any  $0 < \lambda < 1$ , any symmetric, convex sets  $A$  and  $B$  in  $E$ ,

$$\rho(A \cap B) \rho(\lambda^2 A + (1 - \lambda^2) B) \geq \rho(\lambda A) \rho((1 - \lambda^2)^{1/2} B).$$

In particular,

$$\rho(A \cap B) \geq \rho(\lambda A) \rho((1 - \lambda^2)^{1/2} B).$$

Schechtman et al. (1998) probed the above statement for  $\lambda = 1/\sqrt{2}$  and  $E = \mathbb{R}^n$ , and Li (1999) extended the results as above.

### B.3. Proof of Theorems 1 and 2 in the main body

We just need to bound the following term for each  $r, k$ :

$$\hat{R}_{K, \max} \epsilon_{(r,k)}^2 + \frac{1}{n} \phi_{f_r^{*(k)}}^{(r,k)}(\epsilon_{(r,k)}, L_{(r,k)}, \lambda_{(r,k)}) + \frac{1}{n} \lambda_{(r,k)} - \frac{1}{n} \log \left( \frac{\lambda_{(r,k)}}{2} \right), \quad (\text{S-12})$$

by choosing an appropriate  $\epsilon_{(r,k)}, L_{(r,k)}, \lambda_{(r,k)}$  such that  $\epsilon_{(r,k)} \leq L_{(r,k)}$ .

By the definition, we have

$$\|f_r^{*(k)}\|_{\theta, \infty, \mathcal{H}_{(r,k)}} = \sup_{t>0} \inf_{h_r^{(k)} \in \mathcal{H}_{(r,k)}} \{t^{-\theta} \|f_r^{*(k)} - h_r^{(k)}\|_{\infty} + t^{1-\theta} \|h_r^{(k)}\|_{\mathcal{H}_{(r,k)}}\}.$$

With a slight abuse of notation, we denote by  $\|f_r^{*(k)}\|_{\theta, \infty} = \|f_r^{*(k)}\|_{\theta, \infty, \mathcal{H}_{(r,k)}}$ . If  $\inf_{h_r^{(k)} \in \mathcal{H}_{(r,k)}} \|f_r^{*(k)} - h_r^{(k)}\|_{\infty} > 0$ , then the term  $t^{-\theta} \|f_r^{*(k)} - h_r^{(k)}\|_{\infty}$  can be arbitrary large. Therefore the assumption  $R \geq \|f_r^{*(k)}\|_{\theta, \infty}$  ensures that there exists  $h_r^{(k)} \in \mathcal{H}_{(r,k)}$  such that  $\|f_r^{*(k)} - h_r^{(k)}\|_{\infty} \leq \epsilon$  for all  $\epsilon > 0$ . Using this, we evaluate the RKHS norm of the approximator:  $\inf_{h \in \mathcal{H}_{(r,k)}: \|h - f_r^{*(k)}\|_{\infty} \leq \epsilon_{(r,k)}} \|h\|_{\mathcal{H}_{(r,k)}}^2$ . For all  $t > 0$ , there exists  $h_r^{(k)}[t] \in \mathcal{H}_{(r,k)}$  such that  $2\|f_r^{*(k)}\|_{\theta, \infty} \geq t^{-\theta} \|f_r^{*(k)} - h_r^{(k)}[t]\|_{\infty} + t^{1-\theta} \|h_r^{(k)}[t]\|_{\mathcal{H}_{(r,k)}}$ . This gives  $2\|f_r^{*(k)}\|_{\theta, \infty} \geq t^{-\theta} \|f_r^{*(k)} - h_r^{(k)}[t]\|_{\infty}$  so that we have  $t \geq 2^{-\frac{1}{\theta}} \|f_r^{*(k)}\|_{\theta, \infty}^{-\frac{1}{\theta}} \|f_r^{*(k)} - h_r^{(k)}[t]\|_{\infty}^{\frac{1}{\theta}}$ , and hence  $2\|f_r^{*(k)}\|_{\theta, \infty} \geq t^{1-\theta} \|h_r^{(k)}[t]\|_{\mathcal{H}_{(r,k)}}$  yields

$$\|h_r^{(k)}[t]\|_{\mathcal{H}_{(r,k)}} \leq t^{-(1-\theta)} 2\|f_r^{*(k)}\|_{\theta, \infty} \leq 2^{\frac{1}{\theta}} \|f_r^{*(k)}\|_{\theta, \infty}^{\frac{1}{\theta}} \|f_r^{*(k)} - h_r^{(k)}[t]\|_{\infty}^{-\frac{1-\theta}{\theta}}.$$

Therefore we have that

$$\inf_{h \in \mathcal{H}_{(r,k)}: \|h - f_r^{*(k)}\|_{\infty} \leq \epsilon_{(r,k)}} \|h\|_{\mathcal{H}_{(r,k)}}^2 \leq 2^{\frac{2}{\theta}} \|f_r^{*(k)}\|_{\theta, \infty}^{\frac{2}{\theta}} \epsilon_{(r,k)}^{-\frac{2(1-\theta)}{\theta}} \leq (2R)^{\frac{2}{\theta}} \epsilon_{(r,k)}^{-\frac{2(1-\theta)}{\theta}}, \quad (\text{S-13})$$

because for all  $\epsilon > 0$  there exists  $t$  such that  $\|f_r^{*(k)} - h_r^{(k)}[t]\|_{\infty} \leq \epsilon$ .

*Setting (i):* From now on, we assume that  $1 - \theta - s_{(r,k)} \geq 0$ . Here, the metric entropy condition (Assumption 2) gives that there exists  $C'_0$  such that

$$-\log(\text{GP}_{r,k}(\{f : \|f\|_n \leq \epsilon\})) \leq C'_0 \epsilon^{-\frac{2s_{(r,k)}}{1-s_{(r,k)}}}$$

(Kuelbs & Li, 1993; Li & Shao, 2001). Similary, Assumption 6 gives that there exists  $C'_1$  such that

$$-\log(\text{GP}_{r,k}(\{f : \|f\|_{\infty} \leq L\})) \leq C'_1 L^{-\frac{2\bar{s}_{(r,k)}}{1-\bar{s}_{(r,k)}}}.$$

This and Eq. (S-13) give that

$$\phi_{f_r^{*(k)}}^{(r,k)}(\epsilon_{(r,k)}, \lambda_{(r,k)}) \leq (2R)^{\frac{2}{\theta}} \lambda_{(r,k)} \epsilon_{(r,k)}^{-\frac{2(1-\theta)}{\theta}} + C'_0 \left( \frac{\sqrt{\lambda_{(r,k)} \epsilon_{(r,k)}}}{\sqrt{2}} \right)^{-\frac{2s_{(r,k)}}{1-s_{(r,k)}}} + C'_1 \left( \frac{\sqrt{\lambda_{(r,k)} L_{(r,k)}}}{\sqrt{2}} \right)^{-\frac{2\bar{s}_{(r,k)}}{1-\bar{s}_{(r,k)}}} \quad (\text{S-14})$$

where we used

$$\begin{aligned} \|f\|_{\mathcal{H}_{(r,k), \lambda}}^2 &= \lambda \|f\|_{\mathcal{H}_{(r,k)}}^2, \\ -\log(\text{GP}_{r,k}(\{f : \|f\|_n \leq \epsilon_{(r,k)}\} | \lambda_{(r,k)})) &= -\log(\text{GP}_{r,k}(\{f : \|f\|_n \leq \sqrt{\lambda_{(r,k)} \epsilon_{(r,k)}}\})), \\ -\log(\text{GP}_{r,k}(\{f : \|f\|_{\infty} \leq L_{(r,k)}\} | \lambda_{(r,k)})) &= -\log(\text{GP}_{r,k}(\{f : \|f\|_{\infty} \leq \sqrt{\lambda_{(r,k)} L_{(r,k)}}\})). \end{aligned}$$

Now  $\lambda_{(r,k)} = (R \vee 1)^{-\frac{2(1-s_{(r,k)})}{\theta}} \epsilon_{(r,k)}^{\frac{2(1-\theta-s_{(r,k)})}{\theta}}$  balances the first two terms in the right hand side of Eq. (S-14) up to constants. In addition to  $\lambda_{(r,k)}$ , we set  $L_{(r,k)} = (R \vee 1)^{\frac{1-s_{(r,k)}}{\theta}}$ . With this  $\lambda_{(r,k)}$  and  $L_{(r,k)}$ , the RHS of Eq. (S-12) is bounded as

$$\begin{aligned} &\hat{R}_{K, \max} \epsilon_{(r,k)}^2 + \frac{1}{n} \phi_{f_r^{*(k)}}^{(r,k)}(\epsilon_{(r,k)}, L_{(r,k)}, \lambda_{(r,k)}) + \frac{\lambda_{(r,k)}}{n} - \frac{\log(\lambda_{(r,k)})}{n} \\ &\leq \hat{R}_{K, \max} \epsilon_{(r,k)}^2 + \frac{(2^{\frac{2}{\theta}} + C'_0 2^{\frac{s_{(r,k)}}{1-s_{(r,k)}}})}{n} (R \vee 1)^{\frac{2s_{(r,k)}}{\theta}} \epsilon_{(r,k)}^{-\frac{2s_{(r,k)}}{\theta}} \end{aligned}$$

$$\begin{aligned}
 & + \frac{C'_1 2^{\frac{2\tilde{s}(r,k)}{1-\tilde{s}(r,k)}} - \frac{2(1-\theta-s(r,k))\tilde{s}(r,k)}{\theta(1-\tilde{s}(r,k))}}{n} \epsilon_{(r,k)} \\
 & + \frac{\epsilon_{(r,k)}^{\frac{1-\theta-s(r,k)}{\theta}}}{n} - \frac{\log(\epsilon_{(r,k)}^{\frac{1-\theta-s(r,k)}{\theta}})}{n}.
 \end{aligned} \tag{S-15}$$

Here, we set  $\epsilon_{(r,k)}^2 = n^{-\frac{1}{1+s(r,k)/\theta}}$ . When  $1 - \theta - s(r,k) \geq 0$ , by the assumption that  $\tilde{s}(r,k) \leq \frac{s(r,k)}{1-\theta}$ ,

$$\frac{-\frac{2(1-\theta-s(r,k))\tilde{s}(r,k)}{\theta(1-\tilde{s}(r,k))}}{\epsilon_{(r,k)}} \leq \frac{-\frac{2s(r,k)}{\theta}}{\epsilon_{(r,k)}}. \tag{S-16}$$

Therefore, by applying Eq. (S-16) to the RHS of Eq. (S-15), the RHS of Eq. (S-15) is bounded by

$$C \left( \hat{R}_{K,\max} \vee (R \vee 1)^{\frac{2s(r,k)}{\theta}} \right) n^{-\frac{1}{1+s(r,k)/\theta}}. \tag{S-17}$$

where  $C$  is a constant independent of  $n, R$ .

*Setting (ii):* As for the situation,  $1 - \theta - s(r,k) \leq 0$ , we also use the same setting. Then  $\sqrt{\lambda_{(r,k)}} L_{(r,k)} \geq 1$ . Thus we have another bound like

$$-\log(\text{GP}_{r,k}(\{f : \|f\|_\infty \leq \sqrt{\lambda_{(r,k)}} L_{(r,k)}\})) \leq -\log(\text{GP}_{r,k}(\{f : \|f\|_\infty \leq 1\})) \leq -\log(c_1).$$

Then along with the same reasoning as for the situation  $1 - \theta - s(r,k) \geq 0$ , the same upper bound of Eq. (S-12) as Eq. (S-17) with a different constant. This concludes the proof of Theorem 2 by substituting the setting  $(\epsilon_{(r,k)}, L_{(r,k)}, \lambda_{(r,k)})$  as described above into Eq. (S-4) in the statement of Theorem B.1.

Theorem 1 is proved by the same reasoning, but it should be noticed that  $\check{S} = \emptyset$ ,  $\theta = 1$  and  $(R \vee 1)^{\frac{2s(r,k)}{\theta}} \leq (R \vee 1)^2$  because of  $s(r,k) < 1$ .

### C. Proof of minimax lower bound (Theorem 4)

*Proof.* (Theorem 4) The  $\delta$ -packing number  $M(\mathcal{G}, \delta, \|\cdot\|)$  of a function class  $\mathcal{G}$  with respect to a norm  $\|\cdot\|$  is the largest number of functions  $\{f_1, \dots, f_M\} \subseteq \mathcal{G}$  such that  $\|f_i - f_j\| \geq \delta$  for all  $i \neq j$ . Generally, it holds that

$$N(\mathcal{G}, \delta/2, \|\cdot\|) \leq M(\mathcal{G}, \delta, \|\cdot\|) \leq N(\mathcal{G}, \delta, \|\cdot\|). \tag{S-18}$$

For a given  $\delta_n > 0$  and  $\varepsilon_n > 0$ , let  $Q$  be the  $\delta_n$  packing number  $M(\mathcal{H}_{(d^*,K)}(R), \delta_n, L_2(P_{\mathcal{X}}))$  of  $\mathcal{H}_{(d^*,K)}(R)$  and  $N$  be the  $\varepsilon_n$  covering number  $N(\mathcal{H}_{(d^*,K)}(R), \varepsilon_n, L_2(P_{\mathcal{X}}))$  of  $\mathcal{H}_{(d^*,K)}(R)$ . (Raskutti et al., 2010) utilized the techniques developed by (Yang & Barron, 1999) to show the following inequality in their proof of Theorem 2(b) :

$$\begin{aligned}
 \inf_{\hat{f}} \sup_{f^* \in \mathcal{H}_{(d^*,K)}(R)} \mathbb{E}[\|\hat{f} - f^*\|_{L_2(P_{\mathcal{X}})}^2] & \geq \inf_{\hat{f}} \sup_{f^* \in \mathcal{H}_{(d^*,K)}(R)} \frac{\delta_n^2}{2} P[\|\hat{f} - f^*\|_{L_2(P_{\mathcal{X}})}^2 \geq \delta_n^2/2] \\
 & \geq \frac{\delta_n^2}{2} \left( 1 - \frac{\log(N) + \frac{n}{2\sigma^2}\varepsilon_n^2 + \log(2)}{\log(Q)} \right).
 \end{aligned}$$

Thus by taking  $\delta_n$  and  $\varepsilon_n$  to satisfy

$$\frac{n}{2\sigma^2}\varepsilon_n^2 \leq \log(N), \tag{S-19a}$$

$$8 \log(N) \leq \log(Q), \tag{S-19b}$$

$$4 \log(2) \leq \log(Q), \tag{S-19c}$$

the minimax rate is lower bounded by  $\frac{\delta_n^2}{4}$ .

From now on, we are going to evaluate  $\log(N)$  and  $\log(Q)$  in terms of  $\delta_n$  and  $\varepsilon_n$ . For all  $f, f' \in \mathcal{H}_{(d^*, K)}(R)$ , it holds that

$$\begin{aligned} \|f - f'\|_{L_2(P_{\mathcal{X}})}^2 &= \left\| \sum_{r=1}^{d^*} \left( \prod_{k=1}^K f_r^{(k)} - \prod_{k=1}^K f_r'^{(k)} \right) \right\|_{L_2(P_{\mathcal{X}})}^2 \\ &= \sum_{r=1}^{d^*} \left\| \prod_{k=1}^K f_r^{(k)} - \prod_{k=1}^K f_r'^{(k)} \right\|_{L_2(P_{\mathcal{X}})}^2 \end{aligned}$$

by the construction of  $L_2(P_{\mathcal{X}})$  and the assumption that  $E[f_r^{(k)}(X)] = 0$  for all  $f_r^{(k)} \in \mathcal{H}_{(r,k)}$ .

To evaluate the covering number and packing numbers, we construct a packing sets on the ‘‘sphere’’ of each  $\mathcal{H}_{(r,k)}$ . Since  $\mathcal{X}_k$  is a compact metric space and  $k_{(r,k)}$  is continuous, Mercer’s theorem gives the orthogonal decomposition of the kernel function  $k_{(r,k)}$  as

$$k_{(r,k)}(x, x') = \sum_{i=1}^{\infty} \mu_{(r,k),i} \psi_{(r,k),i}(x) \psi_{(r,k),i}(x'), \quad (\text{S-20})$$

where the convergence is absolute and uniform,  $\{\psi_{(r,k),i}\}_{i=1}^{\infty}$  forms an orthonormal system and  $\mu_{(r,k),i} \geq 0$  is the  $i$ -th eigen-value (see Theorem 4.49 in [Steinwart & Christmann \(2008\)](#) for example). We assume that  $\mu_{(r,k),1} \geq \mu_{(r,k),2} \geq \dots$ . As in Assumption 7, there exists  $\hat{f}_r^{(k)} \in \mathcal{B}_{\mathcal{H}_{(r,k)}}$  such that  $\|\hat{f}_r^{(k)}\|_{L_2(P_{\mathcal{X}_k})} \geq c_1$ . Without loss of generality, we may assume that  $\hat{f}_r^{(k)} = \sqrt{\mu_{(r,k),1}} \psi_{(r,k),1}$  because

$$\sqrt{\mu_{(r,k),1}} \psi_{(r,k),1} = \operatorname{argmax}_{f \in \mathcal{B}_{\mathcal{H}_{(r,k)}}} \|f\|_{L_2(P_{\mathcal{X}})}.$$

This can be seen by the relation  $\|f\|_{\mathcal{H}_{(r,k)}}^2 = \sum_{i=1}^n \int \int f(x) f(x') \psi_{(r,k),i}(x) \psi_{(r,k),i}(x') / \mu_{(r,k),i} dP_{\mathcal{X}}(x) dP_{\mathcal{X}}(x')$ . Now, we consider a subspace which is perpendicular to  $\hat{f}_r^{(k)}$ . Let  $\mathcal{H}_{\perp, (r,k)} := \{f \in \mathcal{H}_{(r,k)} \mid \langle f, \hat{f}_r^{(k)} \rangle_{L_2(P_{\mathcal{X}})} = 0\}$ . Then, by the orthogonal decomposition (S-20) and the Mercer representation of RKHSs (Theorem 4.51 of [Steinwart & Christmann \(2008\)](#)), the space  $\mathcal{H}_{\perp, (r,k)}$  can be represented by

$$\mathcal{H}_{\perp, (r,k)} = \left\{ \sum_{i=2}^{\infty} \alpha_i \psi_{(r,k),i} \mid \sum_{i=2}^{\infty} \alpha_i^2 / \mu_{(r,k),i} < \infty \right\}$$

where  $0/0$  is defined as 0.  $\mathcal{H}_{\perp, (r,k)}$  is also an RKHS with a kernel function

$$k_{\perp, (r,k)}(x, x') = \sum_{i=2}^{\infty} \mu_{(r,k),i} \psi_{(r,k),i}(x) \psi_{(r,k),i}(x'),$$

and  $\|f\|_{\mathcal{H}_{\perp, (r,k)}} = \|f\|_{\mathcal{H}_{(r,k)}}$  for all  $f \in \mathcal{H}_{\perp, (r,k)}$ . Now, we evaluate the covering number of  $\mathcal{H}_{\perp, (r,k)}$ . Proposition C.3 with Assumption 7 gives that  $\mu_{(r,k),i} \sim i^{-1/s(r,k)}$ . Thus, we again use Proposition C.3 to obtain that

$$\log N(\mathcal{B}_{\mathcal{H}_{\perp, (r,k)}}, \epsilon, L_2(P_{\mathcal{X}_{(r,k)}})) \sim \epsilon^{-2s(r,k)}.$$

Let  $g_{[j]}$  ( $j = 1, \dots, M_{(r,k)}$ ) be the packing set that gives the packing number  $M_{(r,k)} = M(\mathcal{B}_{\mathcal{H}_{\perp, (r,k)}}, \epsilon, L_2(P_{\mathcal{X}_{(r,k)}}))$ . Note that  $\log M_{(r,k)} \sim \epsilon^{-2s(r,k)}$ . Then,  $\|g_{[j]}\|_{\mathcal{H}_{(r,k)}} \leq 1$  and thus  $\|g_{[j]}\|_{L_2(P_{\mathcal{X}})} \leq \|g_{[j]}\|_{\infty} \leq \sup_x k_{(r,k)}(x, x) \|g_{[j]}\|_{\mathcal{H}_{(r,k)}} \leq 1$ . Now let,

$$\tilde{g}_{[j]} = \sqrt{(1 - \|g_{[j]}\|_{L_2(P_{\mathcal{X}})}^2)} \frac{\hat{f}_r^{(k)}}{\|\hat{f}_r^{(k)}\|_{L_2(P_{\mathcal{X}})}} + g_{[j]}.$$

By the construction of  $g_{[j]}$ , we have  $\langle g_{[j]}, \hat{f}_r^{(k)} \rangle_{L_2(P_{\mathcal{X}})} = 0$  and thus

$$\|\tilde{g}_{[j]}\|_{L_2(P_{\mathcal{X}})}^2 = (1 - \|g_{[j]}\|_{L_2(P_{\mathcal{X}})}^2) + \|g_{[j]}\|_{L_2(P_{\mathcal{X}})}^2 = 1. \quad (\text{S-21})$$



Moreover, since Assumption 7 gives  $\|\widehat{f}_r^{(k)}\|_{L_2(P_{\mathcal{X}})} \geq c_1$ , the RKHS norm of  $\tilde{g}_{[j]}$  is bounded by

$$\|\tilde{g}_{[j]}\|_{\mathcal{H}_{(r,k)}} \leq \frac{\sqrt{(1 - \|g_{[j]}\|_{L_2(P_{\mathcal{X}})}^2)}}{\|\widehat{f}_r^{(k)}\|_{L_2(P_{\mathcal{X}})}} \|\widehat{f}_r^{(k)}\|_{\mathcal{H}_{(r,k)}} + \|g_{[j]}\|_{\mathcal{H}_{(r,k)}} \leq \frac{1 + c_1}{c_1}.$$

Moreover,  $\{\tilde{g}_{[j]}\}_j$  satisfies

$$\|\tilde{g}_{[j]} - \tilde{g}_{[j']}\|_{L_2(P_{\mathcal{X}})} \geq \|g_{[j]} - g_{[j']}\|_{L_2(P_{\mathcal{X}})} \geq \epsilon$$

where we used the orthogonality between  $\widehat{f}_r^{(k)}$  and  $g_{[j]} - g_{[j']}$ . Therefore, we have that

$$M_{(r,k)} \leq M(\mathcal{B}_{\mathcal{H}_{(r,k)}}, \epsilon, L_2(P_{\mathcal{X}_{(r,k)}})).$$

We denote by  $\mathcal{G}_{(r,k)} := \{\tilde{g}_{[j]} (j = 1, \dots, M_{(r,k)})\}$ .

We construct a packing set of  $\mathcal{H}_{(d^*, K)}(R)$  as follows. Let

$$\mathcal{G} = \left\{ g = \sum_{r=1}^{d^*} \prod_{k=1}^K g_r^{(k)} \mid g_r^{(k)} \in \mathcal{G}_{(r,k)} \right\}.$$

Note that

$$|\mathcal{G}| = \prod_{r=1}^{d^*} \prod_{k=1}^K M_{(r,k)}.$$

It will be shown later that any  $g, g' \in \mathcal{G}$  satisfy

$$\|g - g'\|_{L_2(P_{\mathcal{X}})}^2 \geq \sum_{r=1}^{d^*} \min \left\{ \frac{1}{K}, \frac{1}{2} \sum_{k=1}^K \|g_r^{(k)} - g_r'^{(k)}\|_{L_2(P_{\mathcal{X}})}^2 \right\}. \quad (\text{S-22})$$

Thus, if  $|\{(r, k) \mid g_r^{(k)} \neq g_r'^{(k)}\}| \geq \frac{d^* K}{2}$ , then the right hand side of Eq. (S-22) is lower bounded by

$$\|g - g'\|_{L_2(P_{\mathcal{X}})}^2 \geq \frac{d^* K}{2} \epsilon^2 \quad (\text{S-23})$$

for sufficiently small  $\epsilon$ . Now, by the assumption that  $s_{(r,k)} = s$  for all  $r, k$ , we may assume that  $\exists M$  such that  $M_{(r,k)} = M$  for all  $r, k$ . By Lemma C.1, we can construct a subset  $\tilde{\mathcal{G}}$  of  $\mathcal{G}$  such that

$$\begin{aligned} |\tilde{\mathcal{G}}| &\geq \frac{1}{2} \frac{M^{d^* K}}{\binom{d^* K}{d^* K/2} (M+1)^{d^* K/2}}, \\ g, g' \in \tilde{\mathcal{G}}, g \neq g', &\Rightarrow |\{(r, k) \mid g_r^{(k)} \neq g_r'^{(k)}\}| \geq \frac{d^* K}{2}. \end{aligned}$$

Once this is shown,  $\tilde{\mathcal{G}}$  is actually a packing set of  $\mathcal{H}_{(d^*, K)}(R)$  with  $\epsilon_n = \frac{d^* K}{2} \epsilon^2$ , and  $Q = |\tilde{\mathcal{G}}|$  satisfies

$$\log |\tilde{\mathcal{G}}| \geq \frac{d^* K}{4} \log(M) - \frac{d^* K}{2} \log(2) \gtrsim d^* K \log(M)$$

for  $M \geq 5$ . Therefore,

$$\log(Q) \gtrsim d^* K \log(M) \gtrsim d^* K \epsilon^{-2s}.$$

By setting  $\delta_n$  appropriately like  $\delta_n = C\epsilon_n$ , we have  $\log(Q)/2 \leq 8 \log(N) \leq \log(Q)$ , and let  $\epsilon$  to satisfy

$$\frac{n}{2\sigma^2} d^* K \epsilon^2 \lesssim d^* K \epsilon^{-2s}$$

then the inequalities (S-19) are satisfied for  $\epsilon_n = \frac{d^*K}{2}\epsilon^2$ . To satisfy this, we set  $\epsilon \simeq n^{-\frac{1}{1+s}}$  and thus

$$\epsilon_n^2 \simeq \sum_{r=1}^{d^*} \sum_{k=1}^K n^{-\frac{1}{1+s(r,k)}} = d^*Kn^{-\frac{1}{1+s}},$$

then we obtain the assertion.

What remains to be shown is Eq. (S-22). This is shown as follows. First notice that

$$\begin{aligned} \|g - g'\|_{L_2(P_{\mathcal{X}})}^2 &= \left\| \sum_{r=1}^{d^*} \left( \prod_{k=1}^K g_r^{(k)} - \prod_{k=1}^K g_r^{\prime(k)} \right) \right\|_{L_2(P_{\mathcal{X}})}^2 \\ &= \sum_{r=1}^{d^*} \left\| \prod_{k=1}^K g_r^{(k)} - \prod_{k=1}^K g_r^{\prime(k)} \right\|_{L_2(P_{\mathcal{X}})}^2. \end{aligned}$$

Next, we lower bound the summand as follows:

$$\begin{aligned} &\left\| \prod_{k=1}^K g_r^{(k)} - \prod_{k=1}^K g_r^{\prime(k)} \right\|_{L_2(P_{\mathcal{X}})}^2 \\ &= \left\| g_r^{(1)} \prod_{k=2}^K g_r^{(k)} - g_r^{\prime(1)} \prod_{k=2}^K g_r^{\prime(k)} \right\|_{L_2(P_{\mathcal{X}})}^2 \\ &= \left\| (g_r^{(1)} - g_r^{\prime(1)}) \prod_{k=2}^K g_r^{(k)} - g_r^{\prime(1)} \left( \prod_{k=2}^K g_r^{(k)} - \prod_{k=2}^K g_r^{\prime(k)} \right) \right\|_{L_2(P_{\mathcal{X}})}^2 \\ &= \left\| (g_r^{(1)} - g_r^{\prime(1)}) \prod_{k=2}^K g_r^{(k)} \right\|_{L_2(P_{\mathcal{X}})}^2 - 2 \left\langle (g_r^{(1)} - g_r^{\prime(1)}) \prod_{k=2}^K g_r^{(k)}, g_r^{\prime(1)} \left( \prod_{k=2}^K g_r^{\prime(k)} - \prod_{k=2}^K g_r^{(k)} \right) \right\rangle_{L_2(P_{\mathcal{X}})} \\ &\quad + \left\| g_r^{\prime(1)} \left( \prod_{k=2}^K g_r^{\prime(k)} - \prod_{k=2}^K g_r^{(k)} \right) \right\|_{L_2(P_{\mathcal{X}})}^2 \\ &= \left\| g_r^{(1)} - g_r^{\prime(1)} \right\|_{L_2(P_{\mathcal{X}})}^2 \prod_{k=2}^K \left\| g_r^{(k)} \right\|_{L_2(P_{\mathcal{X}})}^2 \\ &\quad - 2 \left\langle g_r^{(1)} - g_r^{\prime(1)}, g_r^{\prime(1)} \right\rangle_{L_2(P_{\mathcal{X}})} \times \left\langle \prod_{k=2}^K g_r^{(k)}, \prod_{k=2}^K g_r^{\prime(k)} - \prod_{k=2}^K g_r^{(k)} \right\rangle_{L_2(P_{\mathcal{X}})} \\ &\quad + \left\| g_r^{\prime(1)} \right\|_{L_2(P_{\mathcal{X}})}^2 \left\| \prod_{k=2}^K g_r^{\prime(k)} - \prod_{k=2}^K g_r^{(k)} \right\|_{L_2(P_{\mathcal{X}})}^2. \end{aligned}$$

Using Lemma C.2 with Eq. (S-21), the RHS is equivalent to

$$\begin{aligned} &\left\| g_r^{(1)} - g_r^{\prime(1)} \right\|_{L_2(P_{\mathcal{X}})}^2 \prod_{k=2}^K \left\| g_r^{(k)} \right\|_{L_2(P_{\mathcal{X}})}^2 - \frac{1}{2} \left\| g_r^{(1)} - g_r^{\prime(1)} \right\|_{L_2(P_{\mathcal{X}})}^2 \times \left\| \prod_{k=2}^K g_r^{\prime(k)} - \prod_{k=2}^K g_r^{(k)} \right\|_{L_2(P_{\mathcal{X}})}^2 \\ &\quad + \left\| g_r^{\prime(1)} \right\|_{L_2(P_{\mathcal{X}})}^2 \left\| \prod_{k=2}^K g_r^{\prime(k)} - \prod_{k=2}^K g_r^{(k)} \right\|_{L_2(P_{\mathcal{X}})}^2 \end{aligned}$$

By using Eq. (S-21), we have that every  $g_r^{(k)} \in \mathcal{G}_{(r,k)}$  satisfies  $\|g_r^{(k)}\|_{L_2(P_{\mathcal{X}})} = 1$ , and thus the RHS is lower bounded as

$$\left\| g_r^{(1)} - g_r^{\prime(1)} \right\|_{L_2(P_{\mathcal{X}})}^2 - \frac{1}{2} \left\| g_r^{(1)} - g_r^{\prime(1)} \right\|_{L_2(P_{\mathcal{X}})}^2 \times \left\| \prod_{k=2}^K g_r^{\prime(k)} - \prod_{k=2}^K g_r^{(k)} \right\|_{L_2(P_{\mathcal{X}})}^2 + \left\| \prod_{k=2}^K g_r^{\prime(k)} - \prod_{k=2}^K g_r^{(k)} \right\|_{L_2(P_{\mathcal{X}})}^2$$

$$\begin{aligned} &\geq \left\| g_r^{(1)} - g_r^{\prime(1)} \right\|_{L_2(P_{\mathcal{X}})}^2 + \left( 1 - \frac{1}{2} \left\| g_r^{(1)} - g_r^{\prime(1)} \right\|_{L_2(P_{\mathcal{X}})}^2 \right) \left\| \prod_{k=2}^K g_r^{\prime(k)} - \prod_{k=2}^K g_r^{(k)} \right\|_{L_2(P_{\mathcal{X}})}^2 \\ &\geq \min \left\{ \frac{1}{K}, \left\| g_r^{(1)} - g_r^{\prime(1)} \right\|_{L_2(P_{\mathcal{X}})}^2 + (1 - 1/2K) \left\| \prod_{k=2}^K g_r^{\prime(k)} - \prod_{k=2}^K g_r^{(k)} \right\|_{L_2(P_{\mathcal{X}})}^2 \right\}. \end{aligned}$$

Applying the same argument  $K$  times, the right hand side is lower bounded by

$$\begin{aligned} &\min \left\{ \frac{1}{K}, (1 - 1/2K)^{K-1} \sum_{k=1}^K \left\| g_r^{(k)} - g_r^{\prime(k)} \right\|_{L_2(P_{\mathcal{X}})}^2 \right\} \\ &\geq \min \left\{ \frac{1}{K}, \frac{1}{2} \sum_{k=1}^K \left\| g_r^{(k)} - g_r^{\prime(k)} \right\|_{L_2(P_{\mathcal{X}})}^2 \right\}. \end{aligned}$$

This shows Eq. (S-22). Then we complete the proof.

**Lemma C.1.** Let  $\Omega = \{1, \dots, M\}^s$ , and define the Hamming distance in  $\Omega$  as  $d(x, y) = \sum_{i=1}^s \mathbf{1}[x_i \neq y_i]$ . Then, there is a subset  $\mathcal{A} \subseteq \Omega$  such that every pair  $x, y \in \mathcal{A}$  s.t.  $x \neq x'$  satisfies

$$d(x, y) \geq s/2$$

and  $|\mathcal{A}| \geq \frac{M^s}{2 \binom{s}{s/2} (M+1)^{s/2}}$ .

*Proof.* The proof is given in the proof of Lemma 4 in Raskutti et al. (2012). □

**Lemma C.2.** Suppose that  $\mathcal{H} \subseteq L_2(P_{\mathcal{X}})$  is a Hilbert space and  $x, y \in \mathcal{H}$  satisfy  $\|x\|_{L_2(P_{\mathcal{X}})} = \|y\|_{L_2(P_{\mathcal{X}})}$ , then it holds that

$$\langle x - y, y \rangle_{L_2(P_{\mathcal{X}})} = -\frac{1}{2} \|x - y\|_{L_2(P_{\mathcal{X}})}^2.$$

*Proof.* Since  $\|x\|_{L_2(P_{\mathcal{X}})}^2 = \|y\|_{L_2(P_{\mathcal{X}})}^2$ , we have that

$$\begin{aligned} \|x\|_{L_2(P_{\mathcal{X}})}^2 &= \|x - y + y\|_{L_2(P_{\mathcal{X}})}^2 = \|x - y\|_{L_2(P_{\mathcal{X}})}^2 + 2\langle x - y, y \rangle_{L_2(P_{\mathcal{X}})} + \|y\|_{L_2(P_{\mathcal{X}})}^2 \\ \Rightarrow 0 &= \|x - y\|_{L_2(P_{\mathcal{X}})}^2 + 2\langle x - y, y \rangle_{L_2(P_{\mathcal{X}})}. \end{aligned}$$

This is equivalent to the assertion. □

**Proposition C.3** (Theorem 15 in Steinwart et al. (2009)). Let  $\mathcal{H}$  be an RKHS associated with a kernel function  $k : \mathcal{X} \times \mathcal{X} \rightarrow \mathbb{R}$ . Suppose that a kernel function  $k$  has an expansion such as

$$k(x, x') = \sum_{i=1}^{\infty} \mu_i \psi_i(x) \psi_i(x')$$

in  $L_2(P_{\mathcal{X}})$  where  $\{\phi_i\}_i \subseteq \mathcal{H}$  is an orthonormal system and  $\mu_1 \geq \mu_2 \geq \dots \geq 0$ . Then, given  $s > 0$ , we have that  $\mu_i \sim i^{-1/s}$  if and only if

$$\mathcal{N}(\mathcal{B}_{\mathcal{H}}, \epsilon, L_2(P_{\mathcal{X}})) \sim \epsilon^{-2s}.$$

□

## References

- Dalalyan, Arnak S. and Tsybakov, Alexander B. Aggregation by exponential weighting sharp PAC-Bayesian bounds and sparsity. *Machine Learning*, 72:39–61, 2008.
- Kuelbs, J. and Li, W. V. Metric entropy and the small ball problem for Gaussian measures. *Journal of Functional Analysis*, 116(1):133–157, 1993.
- Li, W. V. and Shao, Q.-M. Gaussian processes: inequalities, small ball probabilities and applications. *Stochastic Processes: Theory and Methods*, 19:533–597, 2001.
- Li, Wenbo V. A gaussian correlation inequality and its applications to small ball probabilities. *Electronic Communications in Probability*, 4:111–118, 1999.
- Raskutti, Garvesh, Wainwright, Martin, and Yu, Bin. Minimax-optimal rates for sparse additive models over kernel classes via convex programming, 2010. arXiv:1008.3654.
- Raskutti, Garvesh, Wainwright, Martin J, and Yu, Bin. Minimax-optimal rates for sparse additive models over kernel classes via convex programming. *The Journal of Machine Learning Research*, 13(1):389–427, 2012.
- Schechtman, Gideon, Schlumprecht, Th, and Zinn, Joel. On the gaussian measure of the intersection. *Annals of probability*, pp. 346–357, 1998.
- Steinwart, Ingo and Christmann, Andreas. *Support Vector Machines*. Springer, 2008.
- Steinwart, Ingo, Hush, Don, and Scovel, Clint. Optimal rates for regularized least squares regression. In *Proceedings of the Annual Conference on Learning Theory*, pp. 79–93, 2009.
- Suzuki, Taiji. Pac-bayesian bound for gaussian process regression and multiple kernel additive model. In *JMLR Workshop and Conference Proceedings*, volume 23, pp. 8.1–8.20, 2012. Conference on Learning Theory (COLT2012).
- van der Vaart, Aad W. and van Zanten, J. H. Rates of contraction of posterior distributions based on Gaussian process priors. *The Annals of Statistics*, 36(3):1435–1463, 2008a.
- van der Vaart, Aad W. and van Zanten, J. Harry. Reproducing kernel Hilbert spaces of Gaussian priors. *Pushing the Limits of Contemporary Statistics: Contributions in Honor of Jayanta K. Ghosh*, 3:200–222, 2008b. IMS Collections.
- van der Vaart, Aad W. and van Zanten, J. Harry. Information rates of nonparametric Gaussian process methods. *Journal of Machine Learning Research*, 12:2095–2119, 2011.
- Yang, Yuhong and Barron, Andrew. Information-theoretic determination of minimax rates of convergence. *The Annals of Statistics*, 27(5):1564–1599, 1999.
